# Supplementary material
Source: PubMed Central journal article supplement (PMC11028146)
Supplement: 262_2017_2068_MOESM1_ESM.pdf [file 262_2017_2068_MOESM1_ESM.pdf]

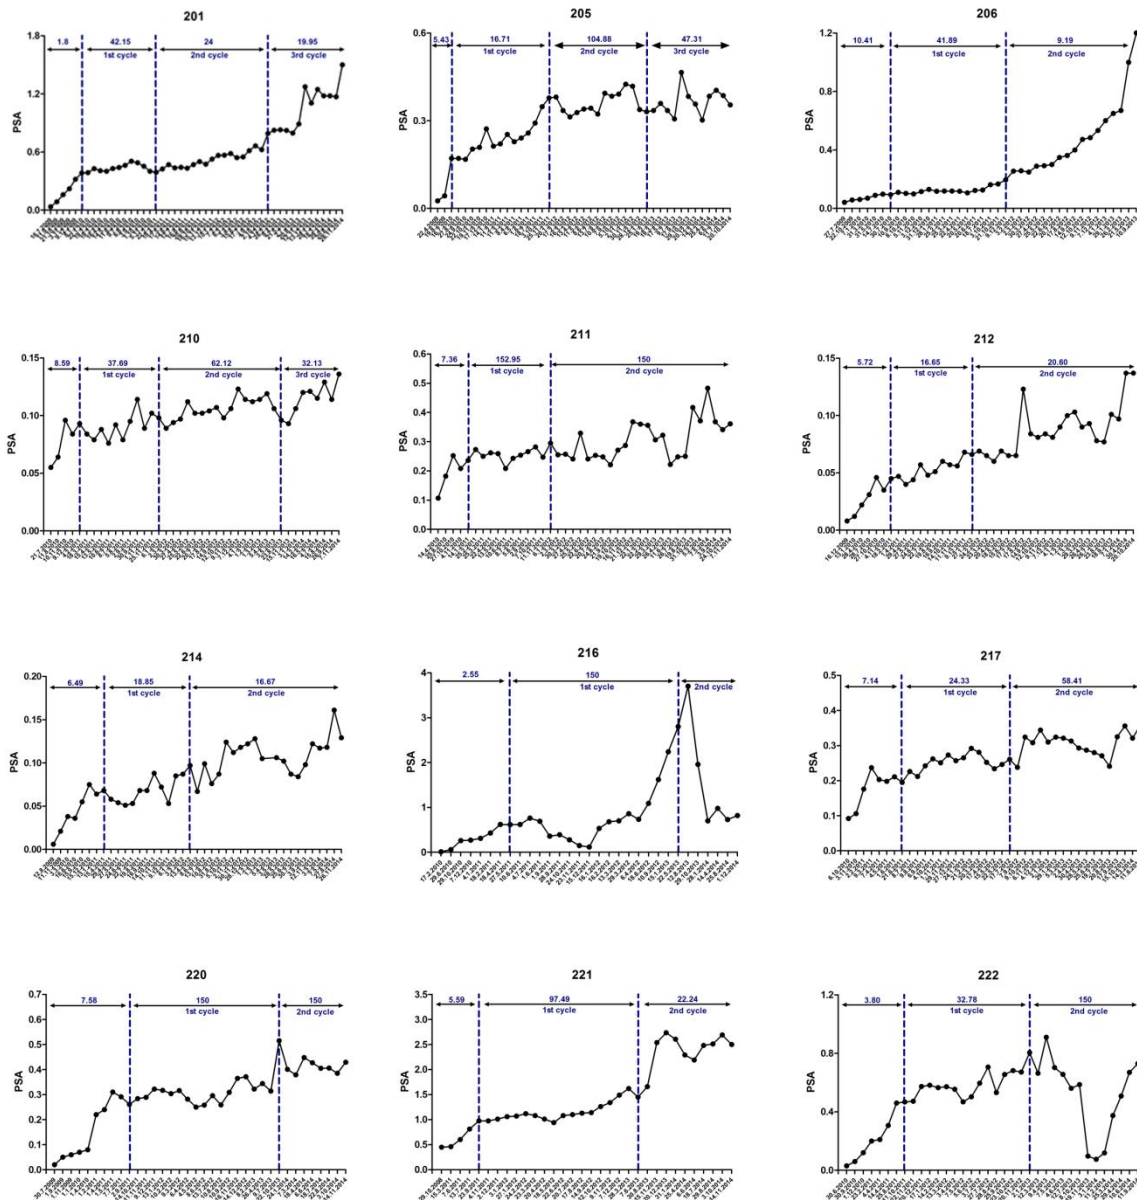

**Supplemental figure 1.** PSA levels before and in the course of DCVAC/PCa treatment

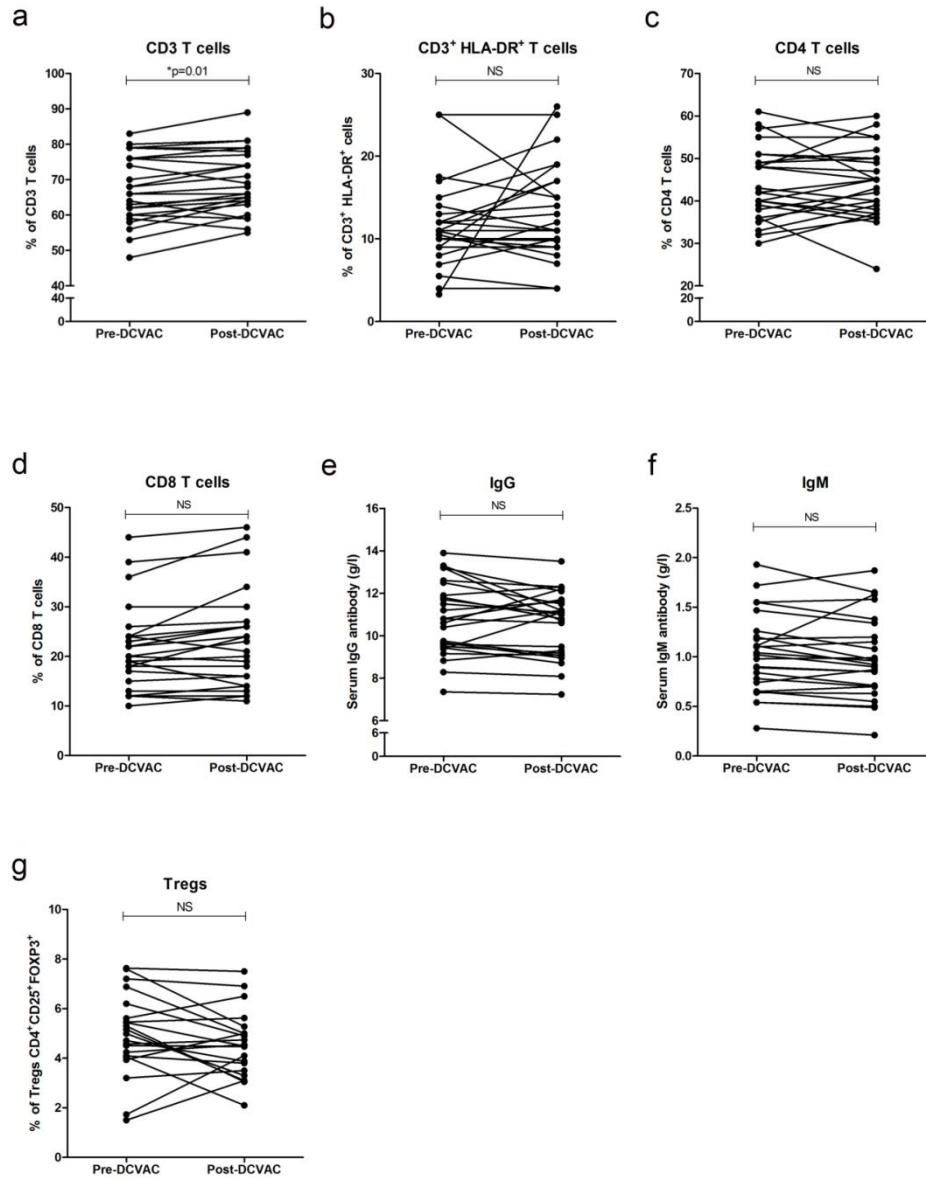

**Supplemental figure 2. Immunological response in the peripheral blood during DCVAC/PCa treatment.** (a) The proportion of CD3<sup>+</sup> was significantly increased after the treatment in 27 evaluated patients, \*p<0.05. The proportions of CD3<sup>+</sup>HLA-DR<sup>+</sup>, CD4<sup>+</sup> and CD8<sup>+</sup> were stable during the course of treatment (b, c, d). Data are expressed as the proportion of CD3<sup>+</sup> cells among CD45<sup>+</sup> cells. The serum concentrations of IgG (e) and IgM (f) were stable during the course of treatment and the frequency of regulatory T cells (CD4<sup>+</sup> CD25<sup>+</sup> FoxP3<sup>+</sup>) was stable after the treatment (g). Data are expressed as the proportion of CD4<sup>+</sup> CD25<sup>+</sup> FoxP3<sup>+</sup> Tregs among CD4<sup>+</sup> T cells.

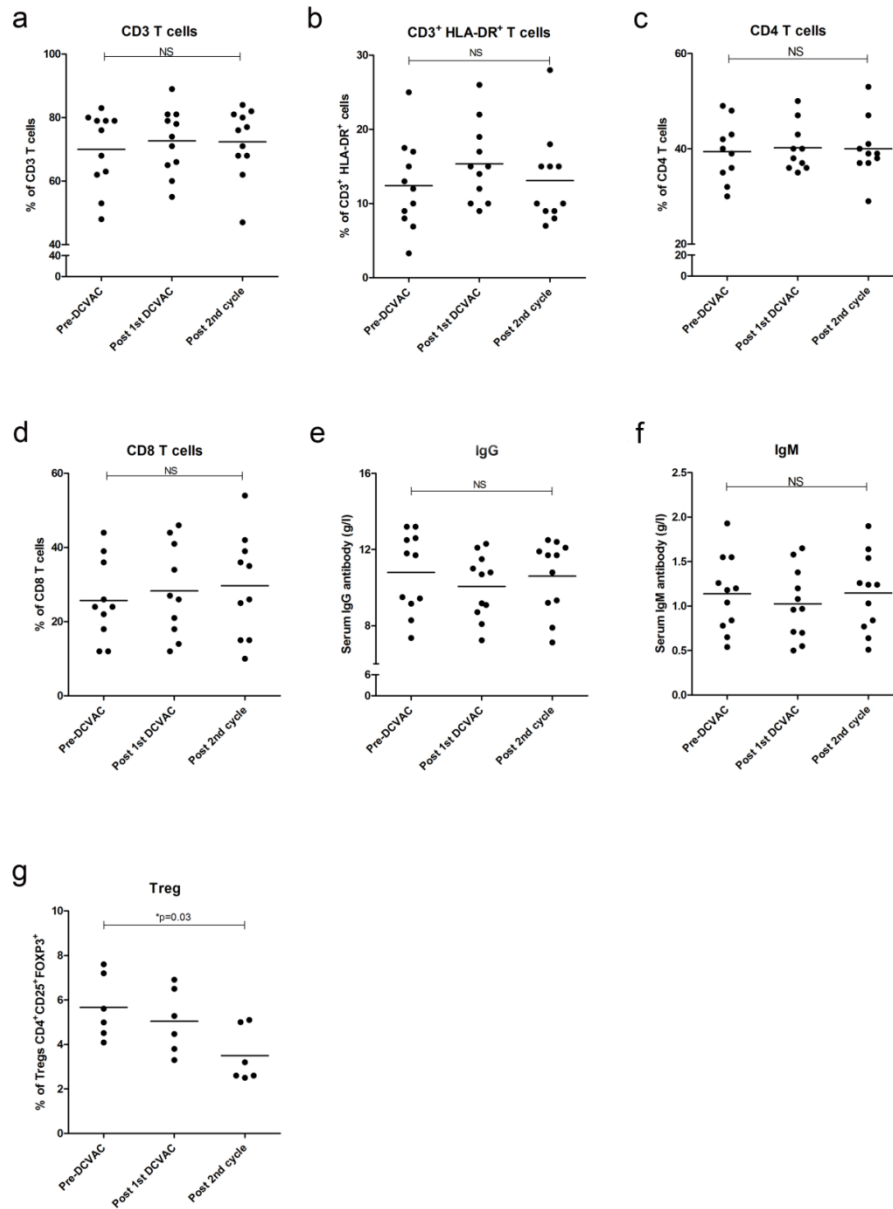

**Supplemental figure 3.** Immunological response in the peripheral blood in subsequent DCVAC/PCa cycle. The proportion of CD3<sup>+</sup> (a), CD3<sup>+</sup>HLA-DR<sup>+</sup> (b), CD4<sup>+</sup> (c) and CD8<sup>+</sup> (d) were stable during the course of subsequent DCVAC/PCa cycle. Presence of serum IgG and IgM were stable during the course of treatment (e, f). The frequency of Tregs (CD4<sup>+</sup> CD25<sup>+</sup> FoxP3<sup>+</sup>) was significantly decreased after the subsequent DCVAC/PCa cycle, \*p<0.05 (g). Data are expressed as the proportion of CD4<sup>+</sup> CD25<sup>+</sup> FoxP3<sup>+</sup> Tregs among CD4<sup>+</sup> T cells.

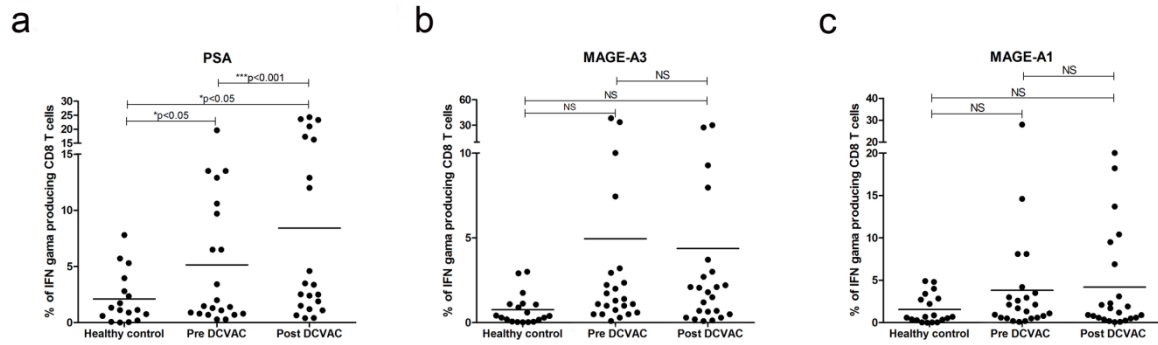

**Supplemental figure 4. Tumor antigen-specific T cell responses during DCVAC/PCa treatment in the peripheral blood versus those of healthy controls. The frequency of PSA (a), MAGE-A1 (b) and MAGE-A3 (c) specific T cells before and after the treatment compared to healthy controls.**

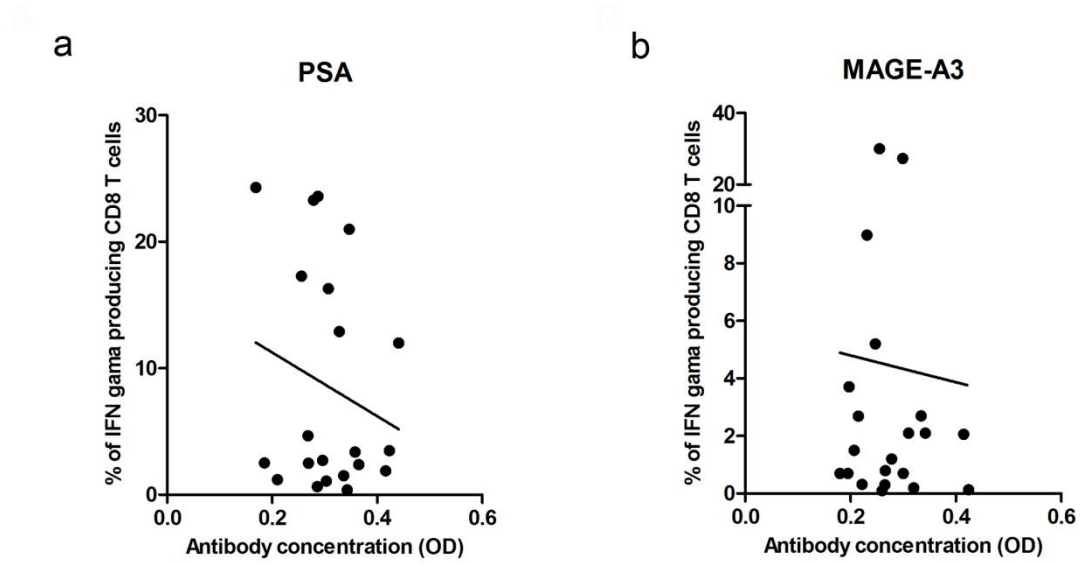

**Supplemental figure 5.** Correlation graph for antigen-specific T cells against PSA (a) and MAGE-A3 (b) and antibody concentrations (OD) detected in the peripheral blood of 27 patients.

|                                                                                                                                            |
|--------------------------------------------------------------------------------------------------------------------------------------------|
| <b>Additional eligibility requirements:</b>                                                                                                |
| 1) Karnofsky performance status >80%                                                                                                       |
| 2) Absence of hormonal therapy                                                                                                             |
| 3) Normal bone marrow, liver and renal function as defined by a WBC > 4x10 <sup>9</sup> /l; platelets > 100x10 <sup>9</sup> /l; Hct > 30%. |
| 4) Creatinine up to 1.5 fold of the upper limit of normal                                                                                  |
| 5) Bilirubin, AST and ALT up to double value of upper limit of normal                                                                      |
| <b>Exclusion criteria:</b>                                                                                                                 |
| 1) History of primary immunodeficiency                                                                                                     |
| 2) A severe allergic or anaphylactic reaction following vaccination                                                                        |
| 3) The presence of pulmonary, cardiac, or other systemic diseases limiting patient survival                                                |
| 4) Other inappropriate conditions for enrollment as judged by the clinician                                                                |

**Supplemental table 1. Additional eligibility requirements and exclusion criteria for entry into the study**
